# Supplementary material for: Multifunctional Cinnamic Acid Derivatives
Source: PubMed Central journal article supplement (PMC6152057; doi:10.3390/molecules22081247), 2017-07-25
Supplement: molecules-22-01247-s001.pdf [file molecules-22-01247-s001.pdf]

# Multifunctional Cinnamic Acid Derivatives

Aikaterini Peperidou <sup>1</sup>, Eleni Pontiki <sup>1</sup>, Dimitra Hadjipavlou-Litina <sup>1,\*</sup>, Efstathia Voulgari <sup>2</sup>  
and Konstantinos Avgoustakis <sup>2</sup>

<sup>1</sup> Department of Pharmaceutical Chemistry, School of Pharmacy, Faculty of Health Sciences, Aristotle University of Thessaloniki, Thessaloniki 54124, Greece; katerina.peperidou@gmail.com (A.P.); epontiki@pharm.auth.gr (E.P.)

<sup>2</sup> Department of Pharmaceutical Technology and Pharmaceutical Analysis, School of Pharmacy, University of Patras, Rio Patras 26504, Greece; efiv48@hotmail.com (E.V.); avgoust@upatras.gr (K.A.)

\* Correspondence: hadjipav@pharm.auth.gr; Tel.: +30-231-099-7627; Fax: +30-231-099-7679

Figure S1. Docking studies of the synthesized novel derivatives.

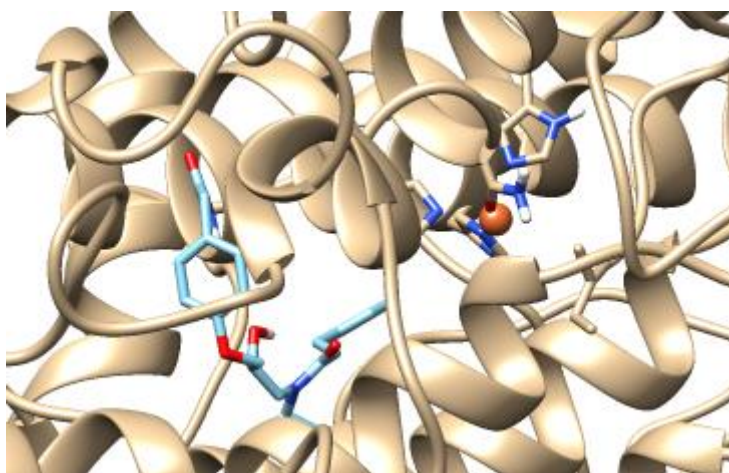

1a

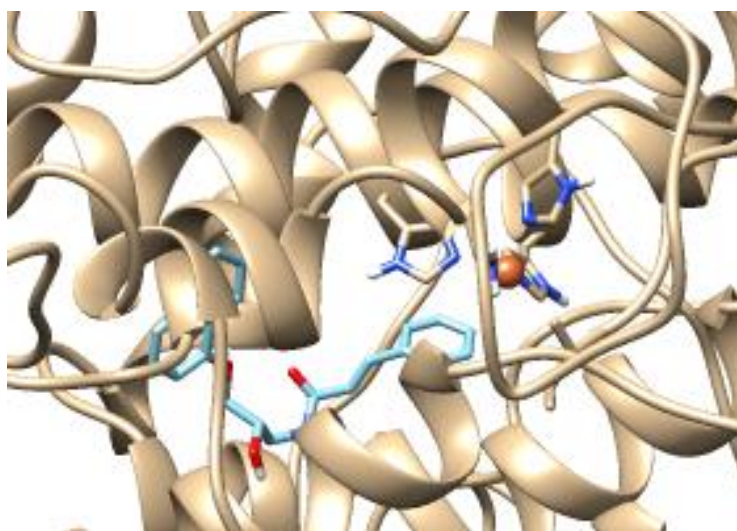

1b

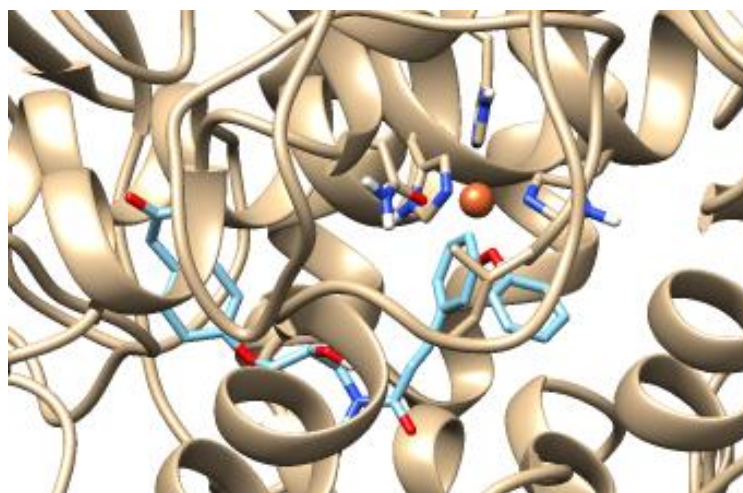

2a

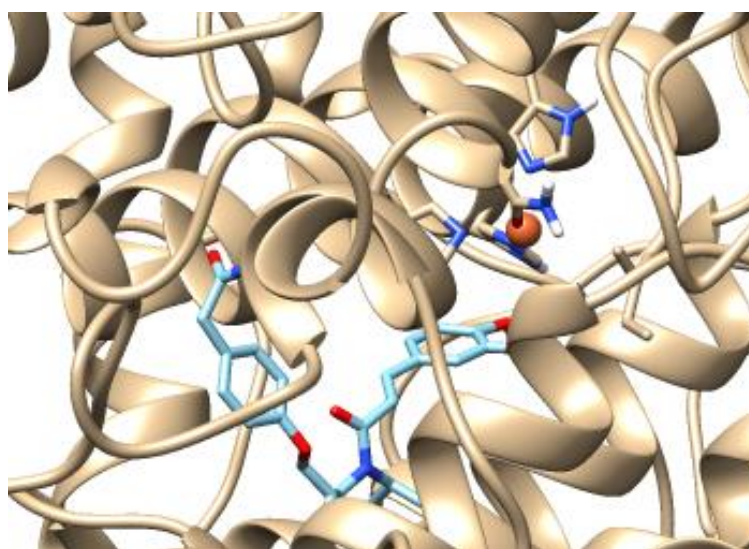

3a

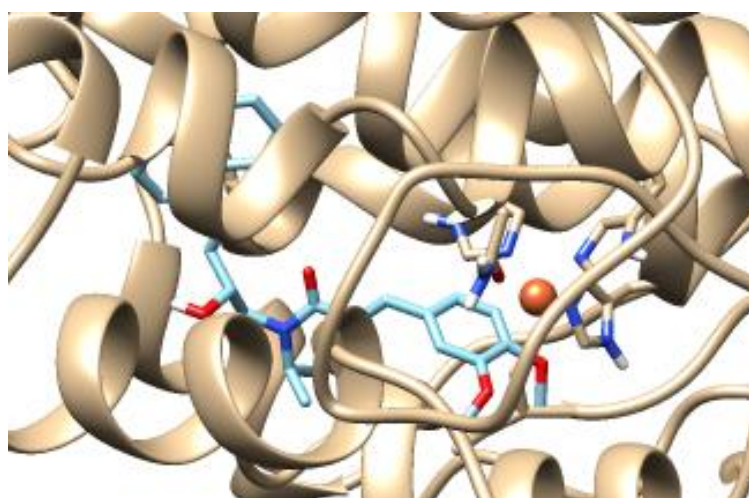

3b

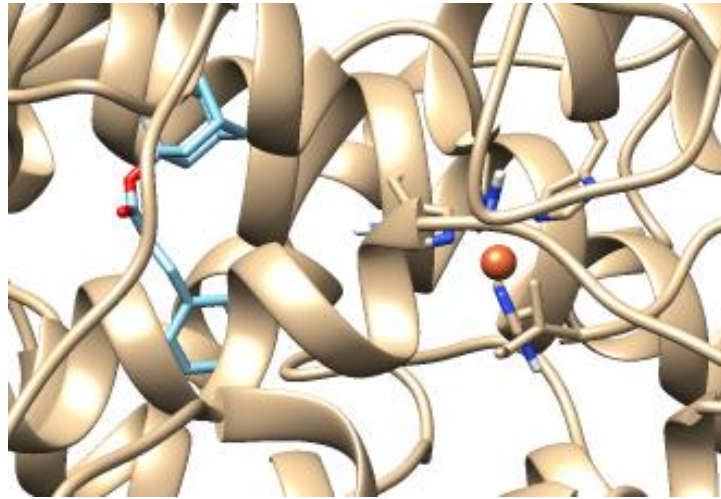

1c

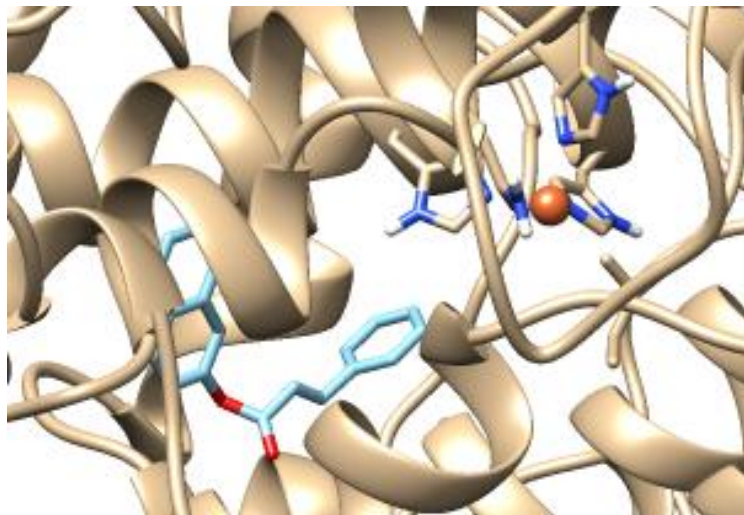

1d

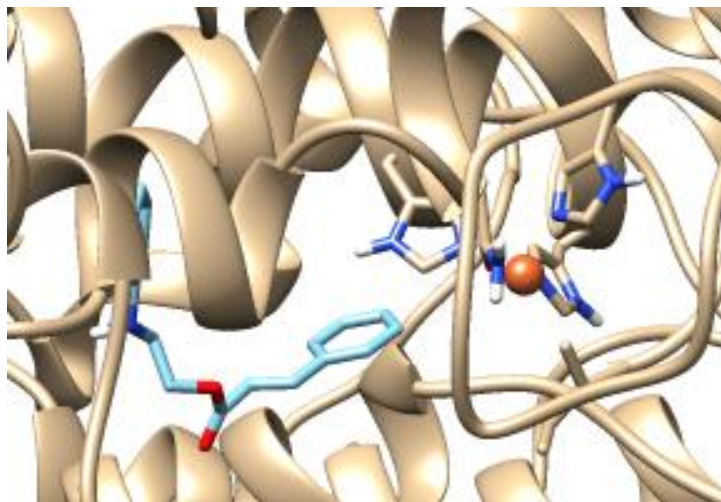

1e

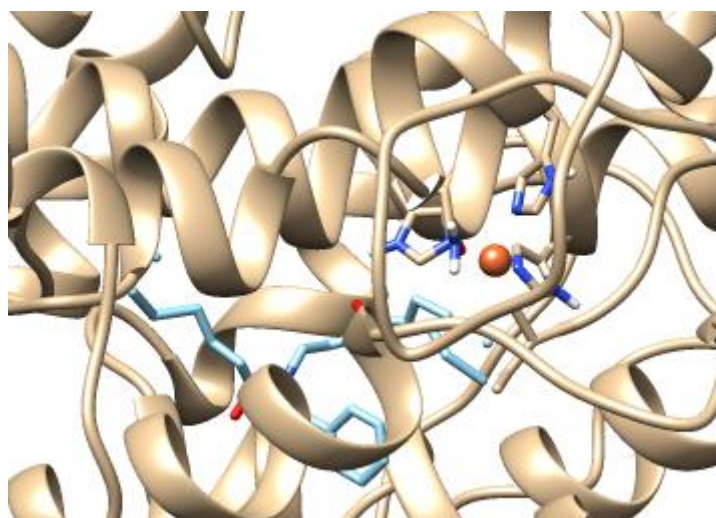

1f
